# Supplementary material
Source: PubMed Central journal article supplement (PMC6287864)
Supplement: ASN.2018060657SupplementaryData2.pdf [file ASN.2018060657SupplementaryData2.pdf]

## **SIGNIFICANCE STATEMENT**

Although older adults with advanced CKD carry a substantial burden from symptoms and disability and often have to accept trade-offs in their treatment, little is known about these patients' health outcome priorities or their nephrology providers' perceptions of these priorities. This study found that more of these patients prioritize maintaining independence than staying alive. Furthermore, these priorities are associated with what patients would find acceptable toward the end of life. Nephrology providers, however, tend to show limited awareness of which health outcomes their individual patients value most. This discordance raises questions regarding nephrology providers' readiness to participate in patient-centered decision-making about initiation of maintenance dialysis and other medical interventions.
